# Supplementary figures and images for: State-of-the-Art Imaging Techniques in Metastatic Spinal Cord Compression
Source: MDPI journal article supplement (doi:10.3390/cancers14133289), 2022-07-05

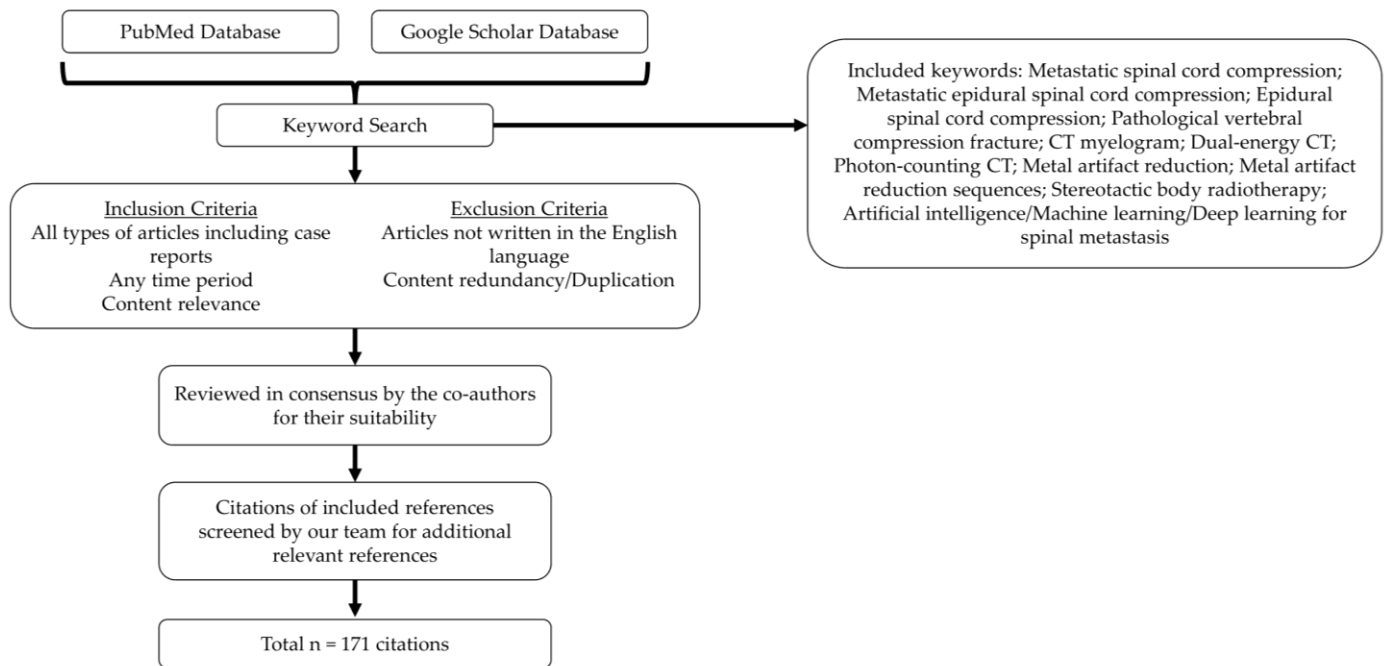

**Figure S1.** Flow Diagram of Search Methods.

Supplement: s1 [file s1]
